# Supplementary material for: Hepatocellular Shuttling and Recirculation of Sorafenib-Glucuronide Is Dependent on Abcc2, Abcc3, and Oatp1a/1b
Source: Oxford University Press journal article supplement (doi:10.1158/0008-5472.can-15-0280), 2015-05-07
Supplement: 00085472can150280-sup-144604_1_supp_2936888_nmrg1f.docx [file 00085472can150280-sup-144604_1_supp_2936888_nmrg1f.docx]

**Supplementary Table S1. Expression of hepatic transporters in various knockout mouse models.***

| **Gene (protein)** | **Wildtype** | **Abcc3(-/-)** | **Abcc4(-/-)** | **Abcc3;**  **Abcc4(-/-)** | **Oatp1a/1b(-/-)** | **Oatp1a/1b;**  **Abcc3(-/-)** |
| --- | --- | --- | --- | --- | --- | --- |
|  |  |  |  |  |  |  |
| Mice with Abcc3 or Oatp1a/1b deficiency | | |  |  |  |  |
| *Abcc2* (Abcc2) | -3.30 ± 0.23 | -3.04 ± 0.40 | - | - | -2.64 ± 0.05* | -2.43 ± 0.28** |
| *Abcc3* (Abcc3) | -1.82 ± 0.14 | - | - | - | -2.68 ± 0.06* | - |
| *Abcc4* (Abcc4) | -8.67 ± 0.35 | -8.17 ± 0.46 | - | - | -8.78 ± 0.40 | -8.21 ± 0.49 |
| *Abcg2* (Bcrp1) | -0.31 ± 0.26 | -0.22 ± 0.41 | - | - | -0.35 ± 0.05 | -0.14 ± 0.39 |
| *Abcb1a* (Mdr1a) | -5.19 ± 0.33 | -6.63 ± 0.90 | - | - | -6.10 ± 0.86 | -6.96 ± 1.28 |
| *Abcb1b* (Mdr1b) | -7.39 ± 0.51 | -6.98 ± 1.05 | - | - | -7.95 ± 0.05 | -7.74 ± 0.69 |
| *Slco1a1* (Oatp1a1) | -2.10 ± 0.15 | -1.66 ± 0.49 | - | - | - | - |
| *Slco1a4* (Oatp1a4) | -0.30 ± 0.39 | -0.90 ± 0.65* | - | - | - | - |
| *Slco1b2* (Oatp1b2) | -4.76 ± 0.16 | -4.38 ± 0.34 | - | - | - | - |
|  |  |  |  |  |  |  |
| Mice with Abcc4 deficiency | |  |  |  |  |  |
| *Abcc2* (Abcc2) | -0.75 ± 0.12 |  | -0.22 ± 0.16** | -0.67 ± 0.33 | - | - |
| *Abcc3* (Abcc3) | 3.91 ± 0.47 |  | 3.39 ± 0.37 | - | - | - |

*Overview of ΔCt values of the real-time RT-PCR analysis to investigate expression of several endogenous uptake and efflux transporters in livers of male wild-type and various knockout strains (n = 3; each sample was assayed in duplicate). Analysis of the results was done by the comparative Ct method. Quantification of the target cDNAs in all samples was normalized against the endogenous control β-actin (Cttarget – Ctβ-actin = ΔCt). **, P<0.05 *vs* wildtype.
